# Supplementary material for: The AMH genotype (rs10407022 T>G) is associated with circulating AMH levels in boys, but not in girls
Source: PubMed Central journal article supplement — Endocr Connect. 2018 Jan 22;7(2):347–54. doi: 10.1530/EC-17-0299 (PMC5825925; doi:10.1530/ec-17-0299), 2018-01-22
Supplement: ec-7-347-t001.pdf [file ec-7-347-t001.pdf]

Supplementary table 1. Hormone levels according to Tanner's genital stages in boys stratified by AMH/AMHR genotypes<sup>a</sup>

|                          |                      | G1                   |                     | G2+3                 |                      | G4+5                  |                       |
|--------------------------|----------------------|----------------------|---------------------|----------------------|----------------------|-----------------------|-----------------------|
|                          |                      | AMH                  | AMHR2               | AMH                  | AMHR2                | AMH                   | AMHR2                 |
|                          |                      | rs10407022 T>G       | rs11170547 C>T      | rs10407022 T>G       | rs11170547 C>T       | rs10407022 T>G        | rs11170547 C>T        |
| AMH<br>(pmol/L)          | WW (n)               | 575 (120-1883) (248) | 600 (66-2075) (286) | 215 (20-1580) (134)  | 232 (20-1580) (150)  | 44 (13-159) (135)     | 48 (13-631) (165)     |
|                          | WM (n)               | 633 (66-2075) (108)  | 607 (231-1883) (78) | 196 (29-1235) (42)   | 150 (36-1086) (32)   | 58 (13-631) (64)      | 43 (19-116) (41)      |
|                          | MM (n)               | 837 (363-1468) (12)  | 828 (549-1161) (4)  | 380 (88-1306) (7)    | 62 (49-75) (2)       | 79 (50-119) (8)       | 56 (35-76) (2)        |
|                          | p-value <sup>b</sup> | <b>0.002</b>         | 0.316               | 0.149                | <b>0.047</b>         | <b>&lt;0.001</b>      | 0.667                 |
| Inhibin B<br>(pg/mL)     | WW (n)               | 83 (27-236) (248)    | 83 (28-285) (286)   | 192 (53-440) (134)   | 191 (53-440) (150)   | 185 (85-406) (135)    | 188 (76-406) (165)    |
|                          | WM (n)               | 84 (28-285) (108)    | 84 (27-163) (78)    | 192 (90-320) (42)    | 196 (103-370) (32)   | 189 (76-384) (64)     | 194 (83-371) (41)     |
|                          | MM (n)               | 82 (51-178) (12)     | 91 (63-161) (4)     | 183 (86-314) (7)     | 206 (191-221) (2)    | 186 (124-280) (8)     | 162 (150-173) (2)     |
|                          | p-value <sup>b</sup> | 0.892                | 0.826               | 0.928                | 0.803                | 0.959                 | 0.663                 |
| FSH<br>(IU/L)            | WW (n)               | 0.8 (0.1-3.7) (248)  | 0.8 (0.1-6.0) (286) | 1.9 (0.4-6.4) (134)  | 1.8 (0.4-8.9) (150)  | 3.1 (0.6-11.0) (135)  | 3.1 (0.5-15.4) (165)  |
|                          | WM (n)               | 0.8 (0.2-6.0) (108)  | 0.7 (0.2-3.7) (78)  | 1.7 (0.5-8.9) (42)   | 2.0 (0.6-5.1) (32)   | 3.0 (0.5-15.4) (64)   | 3.0 (0.7-7.6) (41)    |
|                          | MM (n)               | 1.0 (0.4-2.3) (12)   | 0.8 (0.3-2.0) (4)   | 2.0 (1.1-2.6) (7)    | 2.2 (0.9-3.5) (2)    | 4.0 (0.6-4.6) (8)     | 1.9 (1.3-2.6) (2)     |
|                          | p-value <sup>b</sup> | 0.417                | 0.759               | 0.924                | 0.997                | 0.986                 | 0.228                 |
| LH<br>(IU/L)             | WW (n)               | 0.1 (0.0-2.3) (248)  | 0.1 (0.0-2.1) (286) | 1.2 (0.0-4.6) (134)  | 1.2 (0.0-4.6) (150)  | 3.0 (0.4-9.3) (135)   | 2.9 (1.0-9.3) (165)   |
|                          | WM (n)               | 0.1 (0.0-1.8) (108)  | 0.1 (0.0-1.1) (78)  | 1.1 (0.2-4.5) (42)   | 1.2 (0.2-3.2) (32)   | 2.8 (1.0-7.3) (64)    | 3.0 (0.4-7.5) (41)    |
|                          | MM (n)               | 0.1 (0.0-0.1) (12)   | 0.2 (0.0-0.3) (4)   | 1.0 (0.7-2.0) (7)    | 1.2 (0.6-1.8) (2)    | 1.8 (0.6-3.6) (8)     | 3.2 (2.8-3.6) (2)     |
|                          | p-value <sup>b</sup> | 0.462                | 0.509               | 0.639                | 0.932                | <b>0.012</b>          | 0.925                 |
| Testosterone<br>(nmol/L) | WW (n)               | 0.1 (0.1-0.9) (248)  | 0.1 (0.1-2.1) (286) | 2.7 (0.1-22.4) (134) | 2.3 (0.1-22.4) (150) | 16.2 (4.8-30.5) (135) | 15.8 (3.0-31.0) (165) |
|                          | WM (n)               | 0.1 (0.1-2.1) (108)  | 0.1 (0.1-0.7) (78)  | 2.0 (0.1-14.2) (42)  | 3.5 (0.1-14.5) (32)  | 16.1 (3.0-29.6) (64)  | 17.0 (6.0-26.0) (41)  |
|                          | MM (n)               | 0.1 (0.1-0.4) (12)   | 0.1 (0.1-0.2) (4)   | 1.9 (0.7-6.0) (7)    | 3.7 (1.3-6.1) (2)    | 13.6 (8.8-20.2) (8)   | 16.9 (16.9-17.0) (2)  |
|                          | p-value <sup>b</sup> | 0.327                | 0.433               | 0.741                | 0.406                | 0.492                 | 0.879                 |
| Estradiol<br>(pmol/L)    | WW (n)               | 9 (9-67) (248)       | 9 (9-67) (286)      | 17 (9-57) (134)      | 15 (9-61) (150)      | 48 (9-139) (135)      | 46 (9-139) (165)      |
|                          | WM (n)               | 9 (9-37) (108)       | 9 (9-62) (78)       | 16 (9-61) (42)       | 18 (9-49) (32)       | 47 (9-95) (64)        | 51 (9-114) (41)       |
|                          | MM (n)               | 9 (9-30) (12)        | 9 (4)               | 18 (9-49) (7)        | 20 (9-30) (2)        | 47 (9-88) (8)         | 33 (28-37) (2)        |
|                          | p-value <sup>b</sup> | 0.467                | 0.187               | 0.790                | 0.545                | 0.784                 | 0.072                 |

Data presented as median (range).

<sup>a</sup>W: wildtype allele, M: minor allele (AMH rs10407022: WW: TT, WM: GT, MM: GG, AMHR2 rs11170547 WW:CC, WM: CT, MM: TT). The 100 boys from the longitudinal part of the COPENHAGEN Puberty Study contributed with one observation from each Tanner subgroup.

Minor-allele-effect: <sup>b</sup>Kruskal-Wallis test p-value
