# Supplementary material for: The AMH genotype (rs10407022 T>G) is associated with circulating AMH levels in boys, but not in girls
Source: PubMed Central journal article supplement — Endocr Connect. 2018 Jan 22;7(2):347–54. doi: 10.1530/EC-17-0299 (PMC5825925; doi:10.1530/ec-17-0299), 2018-01-22
Supplement: ec-7-347-t002.pdf [file ec-7-347-t002.pdf]

Supplementary table 2. Hormone levels according to Tanner's breast stages in girls stratified by *AMH/AMHR* genotypes<sup>a</sup>

|                                 |                            | B1                  |                     | B2+3                |                     | B4+5                |                     |
|---------------------------------|----------------------------|---------------------|---------------------|---------------------|---------------------|---------------------|---------------------|
|                                 |                            | <i>AMH</i>          | <i>AMHR2</i>        | <i>AMH</i>          | <i>AMHR2</i>        | <i>AMH</i>          | <i>AMHR2</i>        |
|                                 |                            | rs10407022 T>G      | rs11170547 C>T      | rs10407022 T>G      | rs11170547 C>T      | rs10407022 T>G      | rs11170547 C>T      |
| <b>AMH</b><br>(pmol/L)          | <b>WW (n)</b>              | 22 (2-114) (103)    | 20 (2-114) (114)    | 19 (3-73) (125)     | 20 (4-73) (138)     | 18 (6-52) (69)      | 19 (4-52) (72)      |
|                                 | <b>WM (n)</b>              | 26 (6-82) (33)      | 25 (9-50) (24)      | 26 (4-53) (51)      | 20 (3-49) (37)      | 24 (4-72) (28)      | 20 (9-72) (26)      |
|                                 | <b>MM (n)</b>              | 15 (10-18) (4)      | 26 (1)              | 25 (24-25) (2)      | 19 (12-26) (2)      | 19 (18-34) (3)      | 20 (15-25) (2)      |
|                                 | <b>p-value<sup>b</sup></b> | 0.077               | 0.502               | 0.390               | 0.897               | 0.143               | 0.881               |
| <b>Inhibin B</b><br>(pg/mL)     | <b>WW (n)</b>              | 20 (3-49) (100)     | 18 (3-49) (112)     | 38 (4-129) (124)    | 38 (4-129) (137)    | 64 (13-119) (69)    | 64 (15-139) (72)    |
|                                 | <b>WM (n)</b>              | 18 (3-39) (33)      | 21 (4-42) (23)      | 43 (8-90) (51)      | 40 (10-84) (37)     | 69 (15-118) (28)    | 76 (13-115) (26)    |
|                                 | <b>MM (n)</b>              | 12 (8-19) (4)       | 31 (1)              | 33 (27-39) (2)      | 58 (52-64) (2)      | 37 (27-73) (3)      | 93 (83-103) (2)     |
|                                 | <b>p-value<sup>b</sup></b> | 0.222               | 0.310               | 0.501               | 0.220               | 0.193               | 0.198               |
| <b>FSH</b><br>(IU/L)            | <b>WW (n)</b>              | 1.5 (0.4-8.0) (103) | 1.5 (0.4-8.0) (114) | 3.1 (0.4-7.6) (124) | 3.1 (0.4-7.6) (137) | 5.0 (1.4-11.0) (69) | 5.0 (1.9-11.0) (72) |
|                                 | <b>WM (n)</b>              | 1.3 (0.4-4.0) (33)  | 1.6 (0.4-4.0) (24)  | 3.1 (1.0-7.0) (51)  | 3.4 (0.9-7.2) (37)  | 5.2 (3.3-7.1) (28)  | 4.7 (1.4-7.7) (26)  |
|                                 | <b>MM (n)</b>              | 1.5 (1.4-2.3) (4)   | 1.4 (1)             | 4.3 (3.6-5.1) (2)   | 2.0 (1.8-2.2) (2)   | 5.5 (2.5-7.1) (3)   | 5.3 (4.5-6.1) (2)   |
|                                 | <b>p-value<sup>b</sup></b> | 0.744               | 0.924               | 0.421               | 0.334               | 0.626               | 0.774               |
| <b>LH</b><br>(IU/L)             | <b>WW (n)</b>              | 0.0 (0.0-1.2) (103) | 0.0 (0.0-1.2) (114) | 0.6 (0.0-5.7) (124) | 0.6 (0.0-7.5) (137) | 3.9 (0.2-28.2) (69) | 4.1 (0.2-28.2) (72) |
|                                 | <b>WM (n)</b>              | 0.0 (0.0-0.2) (33)  | 0.0 (0.0-0.2) (24)  | 0.7 (0.0-7.5) (51)  | 0.8 (0.0-4.2) (37)  | 5.0 (2.6-24.0) (28) | 4.7 (0.6-24.0) (26) |
|                                 | <b>MM (n)</b>              | 0.0 (0.0-0.1) (4)   | 1.2 (1)             | 1.1 (0.8-1.4) (2)   | 0.3 (0.2-0.4) (2)   | 5.0 (0.2-6.0) (3)   | 4.3 (3.2-5.4) (2)   |
|                                 | <b>p-value<sup>b</sup></b> | 0.915               | 0.161               | 0.309               | 0.788               | 0.054               | 0.684               |
| <b>Testosterone</b><br>(nmol/L) | <b>WW (n)</b>              | 0.1 (0.1-2.1) (103) | 0.1 (0.1-0.7) (114) | 0.1 (0.1-1.4) (125) | 0.1 (0.1-1.5) (137) | 0.9 (0.1-2.1) (69)  | 0.9 (0.1-2.1) (72)  |
|                                 | <b>WM (n)</b>              | 0.2 (0.1-2.0) (33)  | 0.1 (0.1-0.1) (24)  | 0.3 (0.1-1.5) (51)  | 0.3 (0.1-0.9) (37)  | 1.0 (0.1-2.0) (28)  | 1.1 (0.1-1.8) (26)  |
|                                 | <b>MM (n)</b>              | 0.1 (0.1-0.9) (4)   | 0.1 (1)             | 0.2 (0.1-0.2) (2)   | 0.2 (0.1-0.2) (2)   | 0.1 (0.1-0.9) (3)   | 0.7 (0.7-0.8) (2)   |
|                                 | <b>p-value<sup>b</sup></b> | <b>0.035</b>        | 0.397               | 0.145               | 0.869               | 0.054               | 0.407               |
| <b>Estradiol</b><br>(pmol/L)    | <b>WW (n)</b>              | 15 (9-128) (103)    | 14 (9-128) (114)    | 44 (9-228) (124)    | 42 (9-225) (137)    | 171 (31-681) (69)   | 153 (31-562) (72)   |
|                                 | <b>WM (n)</b>              | 9 (9-36) (33)       | 9 (9-29) (24)       | 41 (9-296) (51)     | 47 (9-296) (37)     | 174 (56-420) (28)   | 194 (32-681) (26)   |
|                                 | <b>MM (n)</b>              | 9 (9-21) (4)        | 9 (1)               | 47 (42-53) (2)      | 48 (36-60) (2)      | 78 (37-113) (3)     | 160 (121-198) (2)   |
|                                 | <b>p-value<sup>b</sup></b> | 0.366               | 0.286               | 0.943               | 0.977               | <b>0.048</b>        | <b>0.037</b>        |

Data presented as median (range).

<sup>a</sup>W: wildtype allele, M: minor allele (*AMH* rs10407022: WW: TT, WM: GT, MM: GG, *AMHR2* rs11170547 WW:CC, WM: CT, MM: TT). The 84 girls from the longitudinal part of the COPENHAGEN Puberty Study contributed with one observation from each Tanner subgroup.

Minor-allele-effect: <sup>b</sup> Kruskal-Wallis test p-value.
